# Supplementary material
Source: PubMed Central journal article supplement (PMC4129945)

**Table 1: Weighted Sample Characteristics by Nativity, Add Health Waves 1-3**

|                                           | <b>First<br/>Gen.</b> | <b>Second<br/>Gen.</b> | <b>Third +<br/>Gen.</b> | <b>All</b> |
|-------------------------------------------|-----------------------|------------------------|-------------------------|------------|
| <i>Nativity and Ethnicity</i>             |                       |                        |                         |            |
| Nativity Group                            | 6                     | 11                     | 83                      | 100        |
| White/Other (Ref.)                        | 17                    | 39                     | 76                      | 68         |
| Black                                     | 6                     | 10                     | 18                      | 16         |
| East Asian                                | 9                     | 5                      | 0                       | 2          |
| Other Asian                               | 22                    | 9                      | 0                       | 3          |
| Mexican                                   | 24                    | 24                     | 4                       | 7          |
| Non-Mexican Hispanic                      | 21                    | 15                     | 2                       | 5          |
| <i>Social/Demographic Characteristics</i> |                       |                        |                         |            |
| Male                                      | 49                    | 51                     | 51                      | 51         |
| Parents Married                           | 73                    | 78                     | 75                      | 72         |
| Parent Less HS (Ref.)                     | 41                    | 32                     | 13                      | 17         |
| Parent HS                                 | 21                    | 26                     | 35                      | 33         |
| Parent Some College                       | 18                    | 23                     | 31                      | 29         |
| Parent College                            | 20                    | 19                     | 21                      | 21         |
| Mean Age, Wave 1                          | 15.8                  | 15.5                   | 15.3                    | 15.4       |
| Mean Family Income (thousands)            | 41.4                  | 44.8                   | 47.7                    | 46.7       |
| <i>Weight</i>                             |                       |                        |                         |            |
| Parent Obese                              | 15                    | 18                     | 25                      | 23         |
| BMI                                       |                       |                        |                         |            |
| Wave 1                                    | 21.5                  | 22.3                   | 22.4                    | 22.3       |
| Wave 2                                    | 22.1                  | 22.7                   | 23                      | 22.9       |
| Wave 3                                    | 24.6                  | 25.5                   | 25.8                    | 25.7       |
| N                                         | 1,364                 | 2,261                  | 11,976                  | 15,601     |

\*Numbers in cells are percentages, unless otherwise noted. Totals may not sum to 100 because of rounding

**Table 2: Growth Curve Estimates of Nativity Differences in BMI Levels and Change: Add Health, Waves 1-3\***

|                      | Total Sample,<br>Unconditional Model |                      | Total Sample,<br>Conditional Model |                      |
|----------------------|--------------------------------------|----------------------|------------------------------------|----------------------|
|                      | Intercept<br>( $\pi_0$ )             | Slope<br>( $\pi_1$ ) | Intercept<br>( $\pi_0$ )           | Slope<br>( $\pi_1$ ) |
| Intercept            | 19.500**<br>(0.05)                   | 0.610**<br>(0.05)    | 19.300**<br>(0.14)                 | 0.609**<br>(0.00)    |
| First Gen.           | -0.593**<br>(0.18)                   | -0.0993**<br>(0.02)  | -0.780**<br>(0.18)                 | -0.102**<br>(0.02)   |
| Sec. Gen.            | 0.222<br>(0.14)                      | -0.0357**<br>(0.01)  | -0.0330<br>(0.15)                  | -0.037**<br>(0.01)   |
| Male                 |                                      |                      | 0.150*<br>(0.07)                   |                      |
| Black                |                                      |                      | 0.989**<br>(0.08)                  |                      |
| East Asian           |                                      |                      | -0.687**<br>(0.20)                 |                      |
| Other Asian          |                                      |                      | 0.908**<br>(0.17)                  |                      |
| Mexican              |                                      |                      | 1.104**<br>(0.14)                  |                      |
| Non-Mexican Hispanic |                                      |                      | 0.855**<br>(0.13)                  |                      |
| Parent HS            |                                      |                      | -0.331**<br>(0.11)                 |                      |
| Parent Some College  |                                      |                      | -0.654**<br>(0.12)                 |                      |
| Parent College       |                                      |                      | -0.963**<br>(0.11)                 |                      |
| Logged Family Income |                                      |                      | -0.009<br>(0.02)                   |                      |
| Married              |                                      |                      | -0.149*<br>(0.07)                  |                      |
| Parent Obese         |                                      |                      | 2.329**<br>(0.09)                  |                      |
| N                    | 15,604                               |                      | 15,604                             |                      |

$\pi_0$  denotes the covariate-specific intercepts at baseline (age 11), while  $\pi_1$  denotes the covariate-specific BMI slopes over the course of the observed period. Reference category for parental education is less than high school.

**Table 3: Growth Curve Estimates of Nativity Differences in BMI Levels and Change: Add Health, Waves 1-3\***

|                                      | (A)                              |                                | (B)                             |                                | (C)                             |                                   |
|--------------------------------------|----------------------------------|--------------------------------|---------------------------------|--------------------------------|---------------------------------|-----------------------------------|
|                                      | First Generation                 |                                | Second Generation               |                                | Third Generation                |                                   |
|                                      | Intercept<br>( $\pi_0$ )         | Slope<br>( $\pi_1$ )           | Intercept<br>( $\pi_0$ )        | Slope<br>( $\pi_1$ )           | Intercept<br>( $\pi_0$ )        | Slope<br>( $\pi_1$ )              |
| Intercept                            | 17.693 <sup>**bc</sup><br>(0.53) | 0.468 <sup>**c</sup><br>(0.05) | 19.024 <sup>**a</sup><br>(0.44) | 0.536 <sup>**c</sup><br>(0.03) | 19.223 <sup>**a</sup><br>(0.20) | 0.660 <sup>**ab</sup><br>(0.02)   |
| Black                                | 1.506 <sup>*</sup><br>(0.64)     | -0.102 <sup>bc</sup><br>(0.06) | 1.191 <sup>*</sup><br>(0.47)    | 0.034 <sup>a</sup><br>(0.04)   | 0.690 <sup>**</sup><br>(0.13)   | 0.0369 <sup>**a</sup><br>(0.01)   |
| East Asian                           | 0.634<br>(0.49)                  | -0.149 <sup>**</sup><br>(0.05) | -0.189<br>(0.46)                | -0.098 <sup>*</sup><br>(0.04)  | -0.342<br>(0.56)                | -0.102 <sup>†</sup><br>(0.05)     |
| Other Asian                          | -0.077 <sup>**bc</sup><br>(0.42) | 0.0132<br>(0.04)               | 1.100 <sup>**c</sup><br>(0.38)  | 0.067 <sup>†</sup><br>(0.04)   | 1.306 <sup>*ab</sup><br>(0.56)  | 0.024<br>(0.05)                   |
| Mexican                              | 1.093 <sup>*</sup><br>(0.55)     | 0.122 <sup>*</sup><br>(0.05)   | 0.646 <sup>†</sup><br>(0.39)    | 0.070 <sup>*</sup><br>(0.03)   | 0.401<br>(0.28)                 | 0.0837 <sup>*</sup><br>(0.03)     |
| Non-Mex. Hispanic                    | 0.766 <sup>*</sup><br>(0.38)     | 0.085 <sup>*</sup><br>(0.04)   | 1.093 <sup>*c</sup><br>(0.37)   | -0.0122<br>(0.03)              | 0.179 <sup>b</sup><br>(0.31)    | 0.0431 <sup>†</sup><br>(0.02)     |
| Parent HS                            | 0.223<br>(0.45)                  | 0.014<br>(0.04)                | -0.344<br>(0.37)                | 0.0509 <sup>c</sup><br>(0.04)  | -0.204<br>(0.19)                | -0.0494 <sup>*b</sup><br>(0.02)   |
| Parent Some College                  | -0.160<br>(0.44)                 | 0.019 <sup>c</sup><br>(0.04)   | -0.421<br>(0.38)                | 0.0165 <sup>c</sup><br>(0.04)  | -0.292<br>(0.19)                | -0.0795 <sup>**ab</sup><br>(0.02) |
| Parent College                       | 0.191<br>(0.39)                  | 0.032 <sup>c</sup><br>(0.04)   | -1.223 <sup>**c</sup><br>(0.44) | 0.002 <sup>c</sup><br>(0.04)   | -0.442 <sup>*b</sup><br>(0.20)  | -0.0992 <sup>**ab</sup><br>(0.02) |
| <i>Tests of Coefficient Equality</i> |                                  |                                |                                 |                                |                                 |                                   |
| Race/Ethnic Slopes                   |                                  |                                |                                 |                                |                                 |                                   |
| x <sup>2</sup> (5)                   | 32.64                            |                                | 15.25                           |                                | 22.70                           |                                   |
| p > x <sup>2</sup>                   | 0.00                             |                                | 0.00                            |                                | 0.00                            |                                   |
| Parental Education Slopes            |                                  |                                |                                 |                                |                                 |                                   |
| x <sup>2</sup> (3)                   | 0.66                             |                                | 1.75                            |                                | 29.25                           |                                   |
| p > x <sup>2</sup>                   | 0.88                             |                                | 0.63                            |                                | 0.00                            |                                   |
| N                                    | 1,364                            |                                | 2,261                           |                                | 11,976                          |                                   |

$\pi_0$  denotes the covariate-specific intercepts at baseline (age 11), while  $\pi_1$  denotes the covariate-specific BMI slopes over the course of the observed period.

The reference categories are as follows: for mother's education, less than high school; for race/ethnicity, non-Hispanic white. Models also control for adolescent sex, marital status, logged family income and parental obesity.

<sup>†</sup><.10; \* p<.05 ; \*\* p <.01

a, b, and c denote significant within-row differences from intercepts or slopes from panels A, B, or C, at the  $p < 0.05$  level.

**Table 4: Predicted BMI by Nativity: Add Health, Waves 1-3\***

| <b>Ethnicity</b>      |                |                 |                 |                |                 |                 |                |                |                |                |                |                 |
|-----------------------|----------------|-----------------|-----------------|----------------|-----------------|-----------------|----------------|----------------|----------------|----------------|----------------|-----------------|
| First Gen.            | Non-Mex.       |                 |                 |                |                 |                 | Black          |                |                |                |                |                 |
|                       | NHW            | Mexican         | Hisp            | East As.       | Oth. As.        |                 |                |                |                |                |                |                 |
| Age 12                | 18.9<br>(0.36) | 20*<br>(0.42)   | 19.7*<br>(0.27) | 19.5<br>(0.40) | 18.8<br>(0.28)  | 20.4*<br>(0.55) |                |                |                |                |                |                 |
| Age 16                | 20.8<br>(0.29) | 21.9*<br>(0.33) | 21.6<br>(0.48)  | 21.5<br>(0.43) | 20.8<br>(0.33)  | 22.4*<br>(0.57) |                |                |                |                |                |                 |
| Age 23                | 24.2<br>(0.32) | 25.4*<br>(0.65) | 25.0*<br>(0.28) | 24.8<br>(0.59) | 24.1<br>(0.51)  | 25.7*<br>(0.69) |                |                |                |                |                |                 |
| <b>Second Gen.</b>    |                |                 |                 |                |                 |                 |                |                |                |                |                |                 |
| Second Gen.           | Non-Mex.       |                 |                 |                |                 |                 | Black          |                |                |                |                |                 |
|                       | NHW            | Mexican         | Hisp            | East As.       | Oth. As.        |                 |                |                |                |                |                |                 |
| Age 12                | 19.7<br>(0.25) | 20.4<br>(0.29)  | 20.8*<br>(0.28) | 19.5<br>(0.44) | 20.8*<br>(0.36) | 20.9*<br>(0.42) |                |                |                |                |                |                 |
| Age 16                | 21.9<br>(0.20) | 22.6<br>(0.32)  | 23*<br>(0.30)   | 21.8<br>(0.45) | 23.1*<br>(0.37) | 23.1*<br>(0.43) |                |                |                |                |                |                 |
| Age 23                | 25.8<br>(0.21) | 26.5<br>(0.41)  | 26.9*<br>(0.39) | 25.6<br>(0.50) | 26.9*<br>(0.44) | 27*<br>(0.49)   |                |                |                |                |                |                 |
| <b>Third Gen.</b>     |                |                 |                 |                |                 |                 |                |                |                |                |                |                 |
| Third Gen.            | Non-Mex.       |                 |                 |                |                 |                 | Black          |                |                |                |                |                 |
|                       | NHW            | Mexican         | Hisp            | East As.       | Oth. As.        |                 |                |                |                |                |                |                 |
| Age 12                | 20<br>(0.06)   | 20.4<br>(0.28)  | 20.2<br>(0.31)  | 19.6<br>(0.55) | 21.3*<br>(0.55) | 20.7*<br>(0.11) |                |                |                |                |                |                 |
| Age 16                | 22.4<br>(0.05) | 22.8<br>(0.28)  | 22.6<br>(0.31)  | 22<br>(0.55)   | 23.7*<br>(0.55) | 23.1*<br>(0.12) |                |                |                |                |                |                 |
| Age 23                | 26.6<br>(0.06) | 27<br>(0.29)    | 26.8<br>(0.32)  | 26.3<br>(0.55) | 27.9*<br>(0.56) | 27.3*<br>(0.14) |                |                |                |                |                |                 |
| <b>Parental Educ.</b> |                |                 |                 |                |                 |                 |                |                |                |                |                |                 |
| Parental Educ.        | First Gen.     |                 |                 |                | Second Gen.     |                 |                |                | Third Gen.     |                |                |                 |
|                       | Less HS        | HS              | Some College    | College        | Less HS         | HS              | Some College   | College        | Less HS        | HS             | Some College   | College         |
| Age 12                | 19.4<br>(0.24) | 19.6<br>(0.33)  | 19.3<br>(0.30)  | 19.6<br>(0.28) | 20.8<br>(0.23)  | 20.5<br>(0.27)  | 20.4<br>(0.28) | 19.6<br>(0.30) | 20.5<br>(0.15) | 20.3<br>(0.09) | 20.2<br>(0.09) | 20.0*<br>(0.11) |
| Age 16                | 21.2<br>(0.21) | 21.5<br>(0.39)  | 21.1<br>(0.36)  | 21.5<br>(0.34) | 23<br>(0.19)    | 22.7<br>(0.30)  | 22.6<br>(0.31) | 21.7<br>(0.34) | 23.2<br>(0.12) | 23<br>(0.12)   | 22.8<br>(0.11) | 22.7*<br>(0.13) |
| Age 23                | 24.4<br>(0.36) | 24.7<br>(0.57)  | 24.3<br>(0.54)  | 24.7<br>(0.54) | 26.8<br>(0.26)  | 26.4<br>(0.43)  | 26.4<br>(0.43) | 25.5<br>(0.46) | 28<br>(0.15)   | 27.7<br>(0.21) | 27.6<br>(0.20) | 27.4*<br>(0.22) |

NHW = Non-Hispanic White; East As. = East Asian; Oth. As. = Other Asian

Standard errors are in parentheses. Probabilities are adjusted for all covariates listed in Table 2, which are held constant at their means. N = 1,364 (first gen.), 2,261 (second gen.), 11,976 (third gen.)

\* denotes significant within-row differences from NHW adolescents, for race/ethnicity; and significant difference from less than HS, for parental education, at the  $p < 0.05$  level.

**Appendix Table 1: Correlation between Self-Reported and Measured BMI for Key Groups**

|                       | Wave 2 BMI |             |            | Wave 3 BMI |             |            |
|-----------------------|------------|-------------|------------|------------|-------------|------------|
|                       | First Gen. | Second Gen. | Third Gen. | First Gen. | Second Gen. | Third Gen. |
| Total Sample          | 0.91       | 0.92        | 0.92       | 0.94       | 0.95        | 0.94       |
| White/Other (Ref.)    | 0.94       | 0.93        | 0.92       | 0.96       | 0.94        | 0.94       |
| Black                 | 0.94       | 0.88        | 0.92       | 0.94       | 0.94        | 0.94       |
| East Asian            | 0.92       | 0.94        | 0.94       | 0.92       | 0.95        | 0.98       |
| Other Asian           | 0.9        | 0.94        | 0.93       | 0.93       | 0.95        | 0.97       |
| Mexican               | 0.9        | 0.89        | 0.9        | 0.95       | 0.94        | 0.91       |
| Non-Mexican Hispanic  | 0.89       | 0.95        | 0.93       | 0.93       | 0.96        | 0.95       |
| Parent Less HS (Ref.) | 0.89       | 0.92        | 0.92       | 0.93       | 0.95        | 0.93       |
| Parent HS             | 0.9        | 0.93        | 0.92       | 0.96       | 0.95        | 0.94       |
| Parent Some College   | 0.92       | 0.92        | 0.92       | 0.95       | 0.95        | 0.94       |
| Parent College        | 0.94       | 0.92        | 0.9        | 0.94       | 0.95        | 0.95       |

Figure 1: Ethnic Differences in BMI Levels and Change, First-Generation Youth

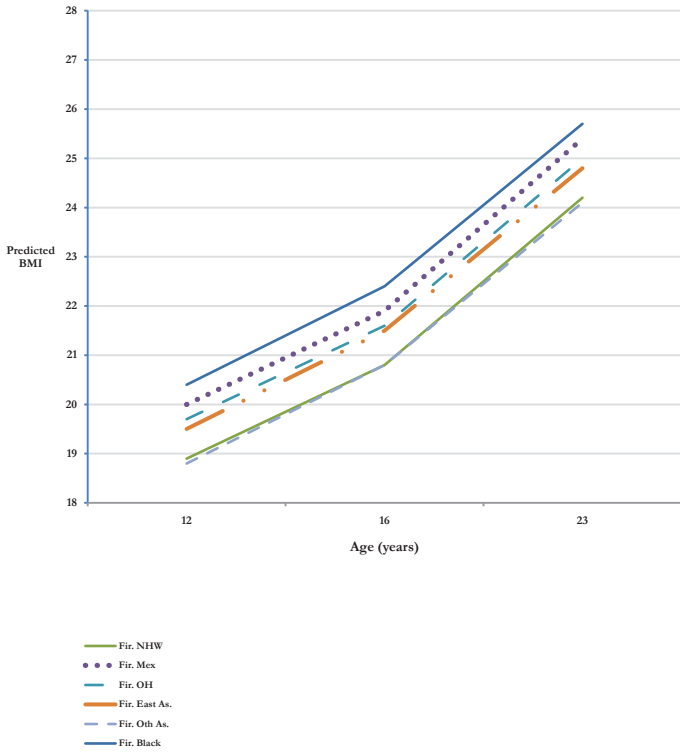

Figure 2A: Education Differences in BMI Levels and Change, First-Generation Youth

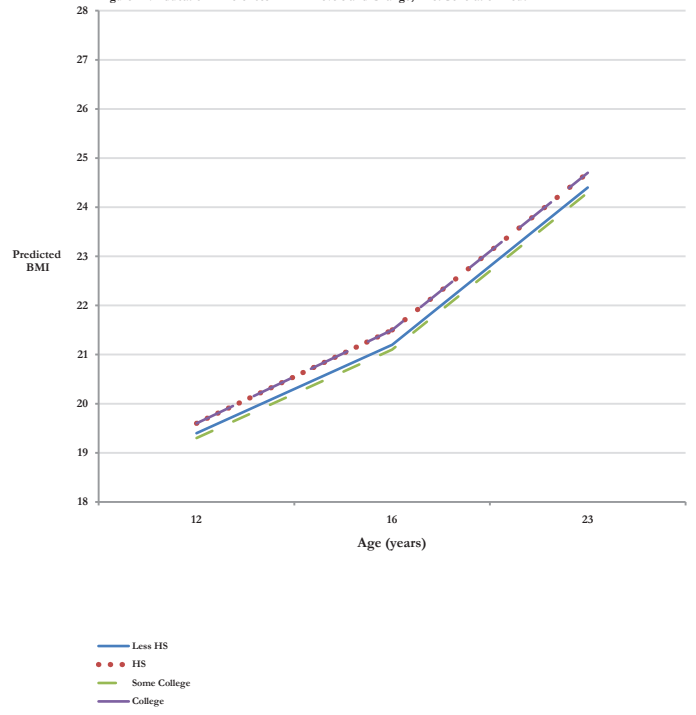

Figure 2B: Education Differences in BMI Levels and Change, Second-Generation Youth

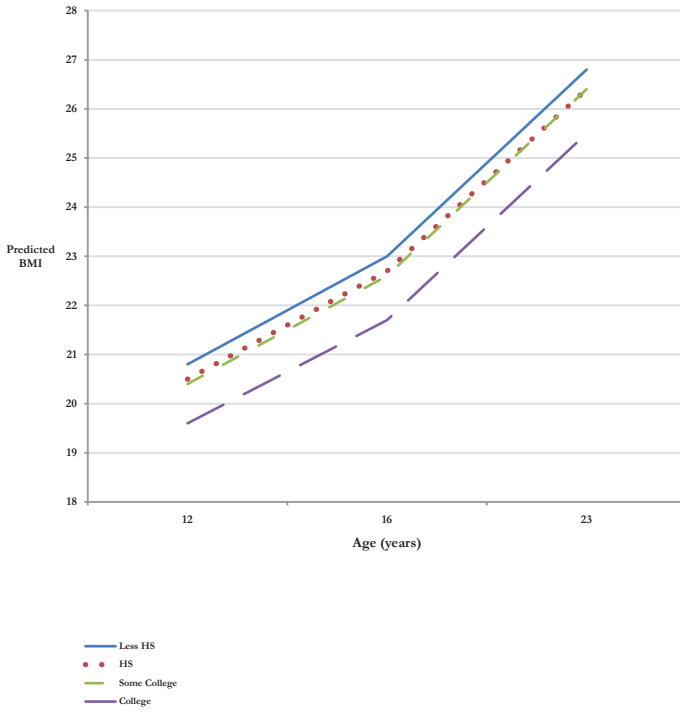

Figure 2C: Education Differences in BMI Levels and Change, Third-Plus Generation Youth

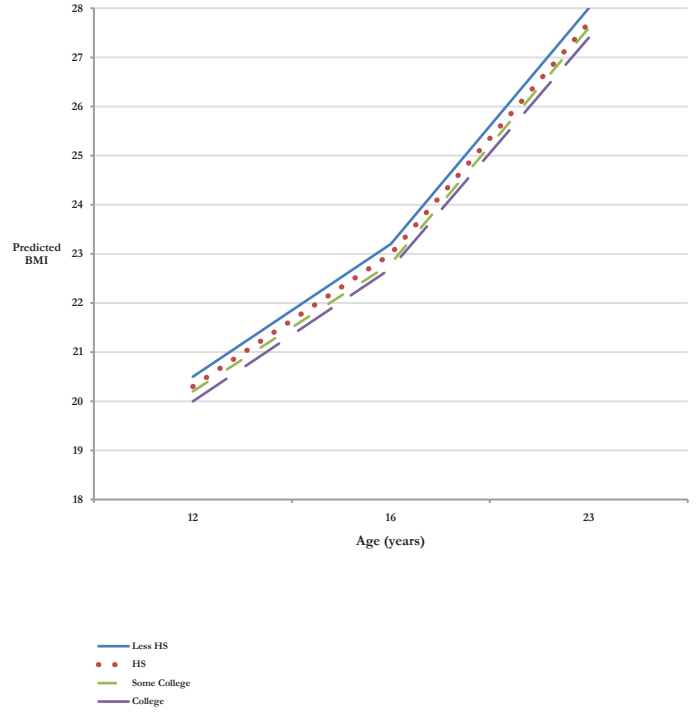

Supplement: NIHMS519508-supplement-Supplemental_Tables___Figures.pdf [file NIHMS519508-supplement-Supplemental_Tables___Figures.pdf]
